# Supplementary material
Source: PubMed Central journal article supplement (PMC3482315)
Supplement: supp_125.17.4036_JCS102848.pdf [file supp_125.17.4036_JCS102848.pdf]

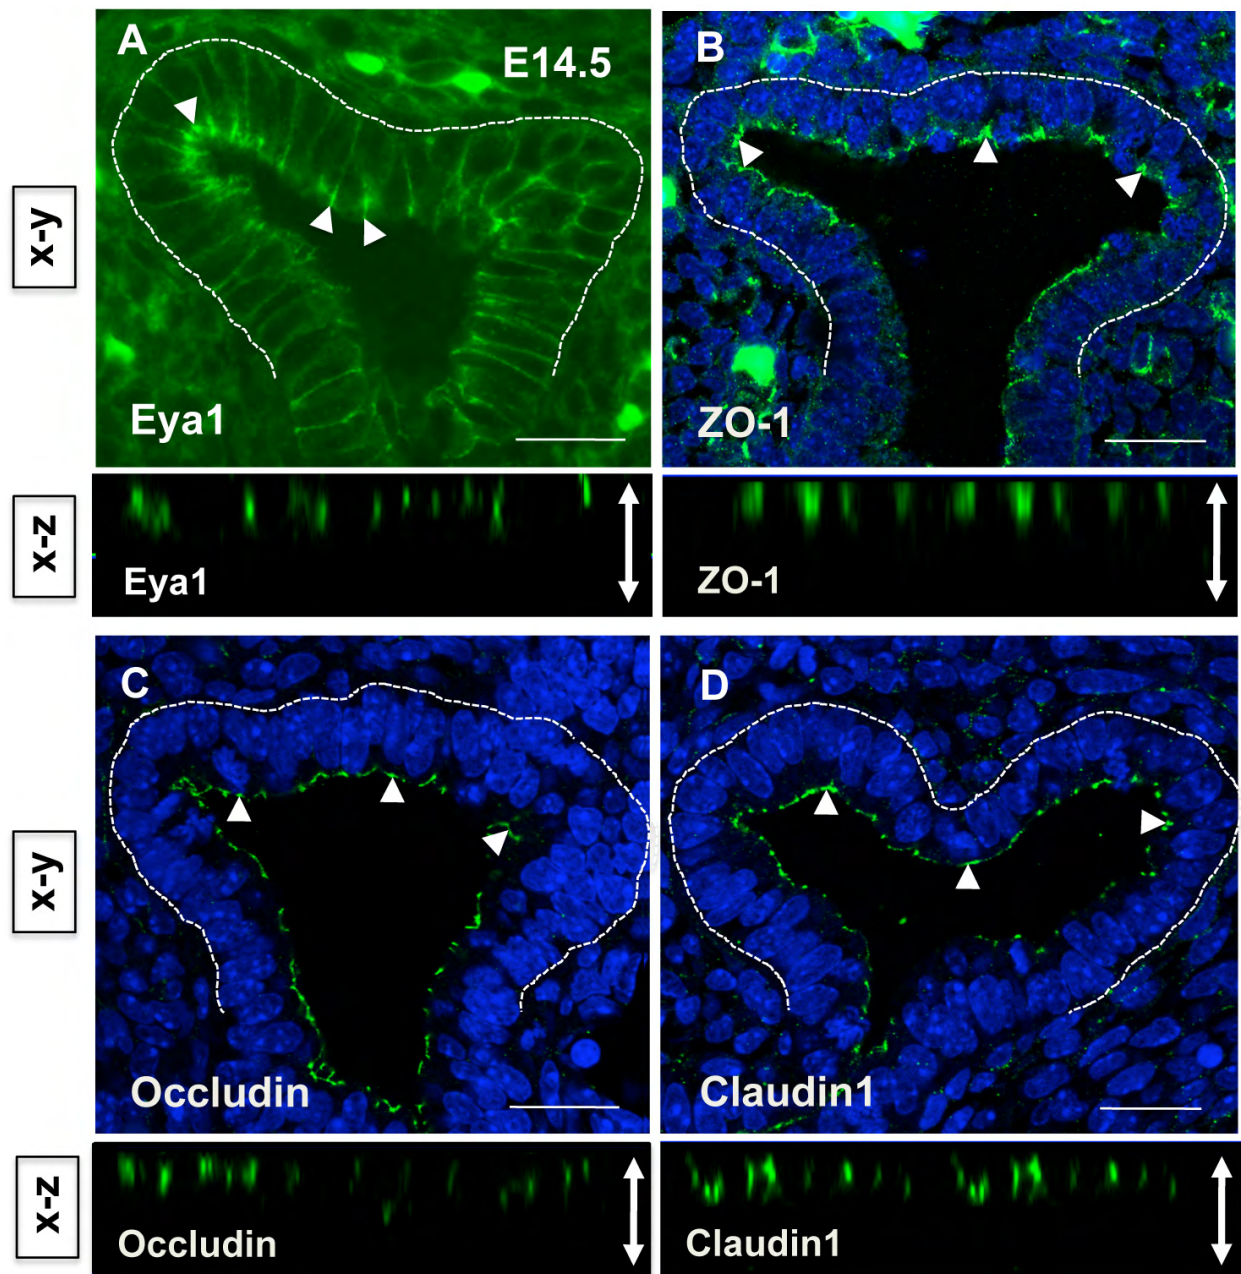

**Fig. S1.** Eya1 and TJ proteins are expressed in the lung. Representative x-y sections and transverse x-z views obtained in E14.5 distal lung epithelial cells labeled with either Eya1 (A), ZO-1 (B), occludin (C) or claudin1 (D) antibodies. Note the localization of Eya1 at areas of intercellular contact (A; arrowheads) similar to TJ proteins that had a belt-like pattern of membrane immunostaining (B,C,D; arrowheads). Scale bars: 50  $\mu$ m. Arrows in x-z images indicate the thickness of the epithelium. Bars: 10  $\mu$ m. Broken line represents the collagen IV-stained basement membrane.

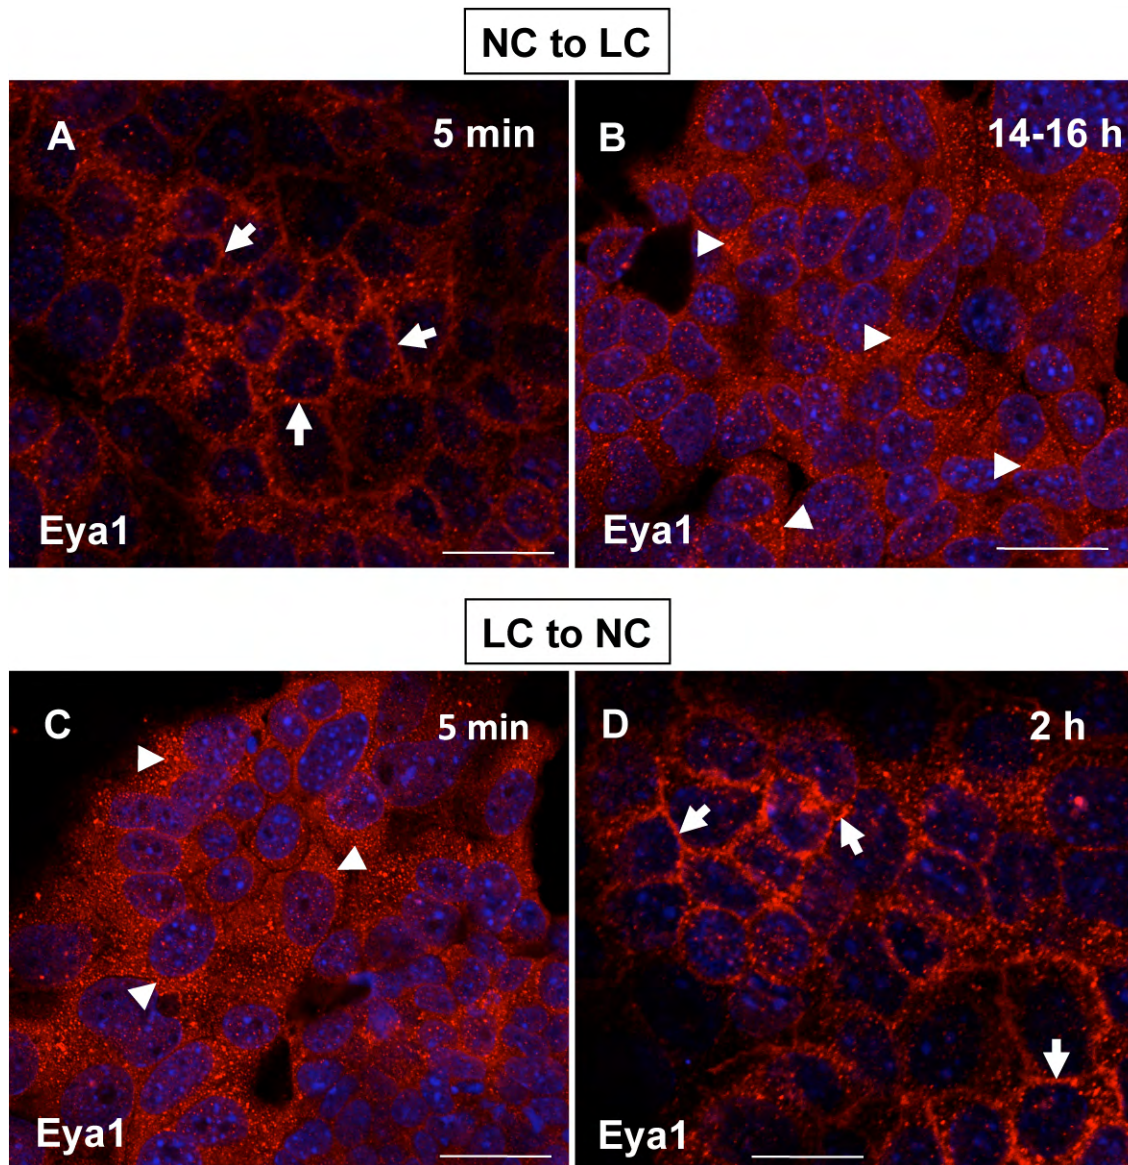

**Fig. S2.** (A-D) Immunocytochemistry with Eya1 antibody shows that the sub-cellular localization of Eya1 protein in MLE15 cells is  $\text{Ca}^{2+}$  dependent. (A) The Eya1 expression domain (arrows) is strongly visualized at the periphery of MLE15 cells grown in NC medium. (B)  $\text{Ca}^{2+}$ -deprived MLE15 cells show an apparent disappearance of the peripheral membrane staining for Eya1 that localizes to the cytosol (arrowheads). (C,D)  $\text{Ca}^{2+}$  starvation of cells overnight before switching to NC medium for 5 min (C) or 2 h (D) in order to induce junction biogenesis results in gradual re-concentration of Eya1 protein at sites of cell-cell contact (arrows in D). Scale bars: 50  $\mu\text{m}$ .

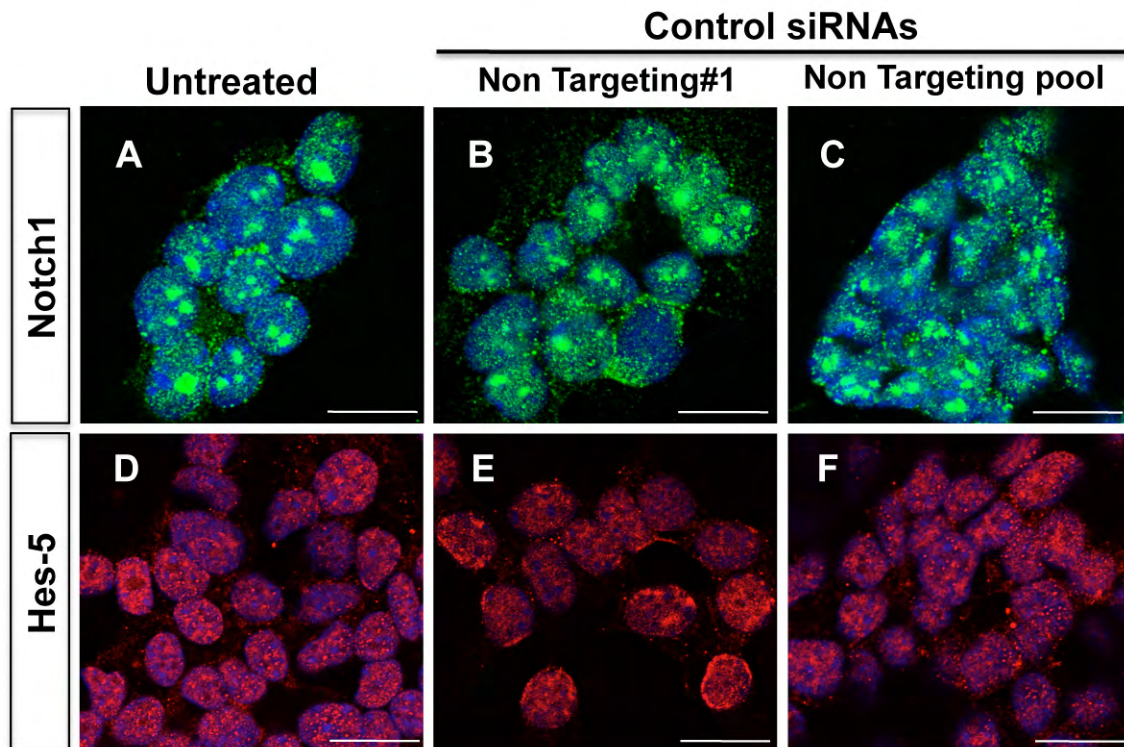

**Fig. S3.** (A-F) Immunostaining of MLE15 cells grown in culture with specific antibodies after transfection for 3 days with the indicated control siRNAs, used at 20 nM. Note that nonspecific siRNAs displayed no apparent effect on Notch1 and Hes-5 expression levels. Scale bars: 50  $\mu$ m.
